# Supplementary material for: Mental, Physical and Socio-Economic Status of Adults Living in Spain during the Late Stages of the State of Emergency Caused by COVID-19
Source: MDPI journal article supplement (doi:10.3390/ijerph19020854), 2022-01-13
Supplement: s1 [file s1]

|                         |                          |      |                 |                          |      |             |                            |      |             |
|-------------------------|--------------------------|------|-----------------|--------------------------|------|-------------|----------------------------|------|-------------|
| No studies or elemental | 5.69 (4.75)              | 7.16 | <b>&lt;.001</b> | 8.62 (5.12)              | 3.59 | <b>.028</b> | 11.23 (6.03)               | 3.38 | <b>.035</b> |
| Secondary studies       | 7.02 87.82) <sup>a</sup> |      |                 | 9.62 (9.32) <sup>a</sup> |      |             | 13.83 (10.19) <sup>a</sup> |      |             |
| University studies      | 5.20 (6.47) <sup>a</sup> |      |                 | 6.55 (7.87) <sup>a</sup> |      |             | 11.47 (9.12) <sup>a</sup>  |      |             |

#### Marital status

|                                  |                          |      |             |                           |       |                 |                            |      |             |
|----------------------------------|--------------------------|------|-------------|---------------------------|-------|-----------------|----------------------------|------|-------------|
| Single                           | 7.19 (7.76) <sup>a</sup> | 3.89 | <b>.009</b> | 10.64 (9.80) <sup>a</sup> | 13.23 | <b>&lt;.001</b> | 14.20 (10.72) <sup>a</sup> | 4.11 | <b>.007</b> |
| Married or living with a partner | 5.19 (6.56) <sup>a</sup> |      |             | 6.08 (7.12) <sup>a</sup>  |       |                 | 11.28 (8.65) <sup>a</sup>  |      |             |
| Divorced                         | 3.94 (4.56) <sup>a</sup> |      |             | 4.11 (4.99) <sup>a</sup>  |       |                 | 10.00 (7.06) <sup>a</sup>  |      |             |
| Widow/widower                    | 4.67 (5.03)              |      |             | 7.33 (7.02)               |       |                 | 11.33 (6.43)               |      |             |

---

Note: Highlighted p were significant at .05, .01 or .001. \* t –test were computed for comparison between gender; ANOVAs were computed for comparisons between more than 2 groups. Superscript letters refer to categories between which there are significant differences.

**Table S2: Mean comparisons for mental health-related variables: worries (N=460).**

| Worries                                          | Gender         |                |                | Age                         |                |                |                             | F (p)                       | Education      |                             |                             | F (p)                       | Marital status |                                     |                             |                             | F (p)          |
|--------------------------------------------------|----------------|----------------|----------------|-----------------------------|----------------|----------------|-----------------------------|-----------------------------|----------------|-----------------------------|-----------------------------|-----------------------------|----------------|-------------------------------------|-----------------------------|-----------------------------|----------------|
|                                                  | Female         | Male           | t (p)          | 18 - 24                     | 25 - 40        | 41 - 65        | >65                         |                             | Elementary     | Secondary                   | University                  |                             | Single         | Married<br>living with a<br>partner | Divorced                    | Widow /<br>widower          |                |
| One's own health<br>and of close<br>people       | 8.20<br>(2.37) | 7.30<br>(2.94) | 2.94<br>(.004) | 7.85<br>(2.57)              | 8.27<br>(2.54) | 7.94<br>(2.58) | 7.06<br>(1.48)              | 1.45<br>(.227)              | 8.79<br>(1.48) | 8.13<br>(2.62)              | 7.86<br>(2.53)              | 1.37<br>(.256)              | 7.70<br>(2.88) | 8.25<br>(2.18)                      | 7.72<br>(2.88)              | 8.33<br>(1.53)              | 1.93<br>(.123) |
| Future                                           | 7.86<br>(2.53) | 7.21<br>(2.48) | 2.37<br>(.018) | 8.14<br>(2.26) <sup>a</sup> | 7.68<br>(2.57) | 7.64<br>(2.50) | 5.38<br>(3.46) <sup>a</sup> | 6.02<br>( <b>&lt;.001</b> ) | 8.21<br>(2.97) | 8.17<br>(2.22) <sup>a</sup> | 7.40<br>(2.65) <sup>a</sup> | 5.63<br>(.004)              | 7.75<br>(2.54) | 7.68<br>(2.51)                      | 7.64<br>(2.76)              | 8.00<br>(2.00)              | .06<br>(.982)  |
| Being supportive<br>with others                  | 7.21<br>(2.68) | 6.34<br>(2.62) | 3.03<br>(.003) | 6.77<br>(2.79)              | 7.01<br>(2.76) | 7.11<br>(2.56) | 7.69<br>(2.70)              | .79<br>(.503)               | 7.71<br>(3.45) | 7.19<br>(2.54)              | 6.87<br>(2.73)              | 1.27<br>(.282)              | 6.57<br>(2.97) | 7.37<br>(2.36)                      | 6.89<br>(2.94)              | 7.67<br>(1.53)              | 3.45<br>(.017) |
| Own education or<br>the education of<br>children | 6.87<br>(3.57) | 6.35<br>(3.60) | 1.35<br>(.178) | 7.37<br>(3.04)              | 6.46<br>(3.78) | 6.74<br>(3.61) | 4.44<br>(4.27)              | 3.92<br>(.009)              | 7.00<br>(3.94) | 7.56<br>(3.12) <sup>a</sup> | 6.23<br>(3.74) <sup>a</sup> | 7.99<br>( <b>&lt;.001</b> ) | 6.37<br>(3.65) | 7.21<br>(3.32)                      | 5.42<br>(4.42) <sup>a</sup> | 9.00<br>(1.00) <sup>a</sup> | 4.25<br>(.006) |

a

a

|                                  |                |                |                |                             |                              |                              |                               |                  |                |                             |                             |                  |                |                |                |                |                |
|----------------------------------|----------------|----------------|----------------|-----------------------------|------------------------------|------------------------------|-------------------------------|------------------|----------------|-----------------------------|-----------------------------|------------------|----------------|----------------|----------------|----------------|----------------|
| Interpersonal relationships      | 6.80<br>(3.07) | 5.96<br>(3.11) | 2.51<br>(.012) | 6.88<br>(2.99)              | 7.03<br>(2.98)               | 6.31<br>(3.14)               | 4.56<br>(3.29)                | 4.31<br>(.005)   | 6.36<br>(3.61) | 7.01<br>(3.039)             | 6.38<br>(3.09)              | 2.36<br>(.095)   | 6.54<br>(3.18) | 6.74<br>(3.00) | 6.19<br>(3.36) | 5.67<br>(2.08) | .49<br>(.688)  |
| Household's income               | 6.76<br>(3.36) | 5.99<br>(3.30) | 2.13<br>(.033) | 7.09<br>(3.06) <sup>a</sup> | 7.17<br>(3.17) <sup>b</sup>  | 6.08<br>(3.52) <sup>ab</sup> | 3.88<br>(3.18) <sup>ab</sup>  | 7.78<br>(<.001)  | 7.64<br>(3.43) | 7.42<br>(3.03) <sup>a</sup> | 6.03<br>(3.44) <sup>a</sup> | 10.75<br>(<.001) | 6.85<br>(3.30) | 6.46<br>(3.37) | 6.31<br>(3.55) | 4.67<br>(4.73) | .92<br>(.429)  |
| Work                             | 6.20<br>(3.50) | 5.66<br>(3.35) | 1.42<br>(.156) | 5.79<br>(3.43) <sup>a</sup> | 6.98<br>(3.17) <sup>ab</sup> | 5.96<br>(3.43) <sup>bc</sup> | 1.88<br>(3.34) <sup>abc</sup> | 12.21<br>(<.001) | 6.29<br>(4.50) | 6.06<br>(3.64)              | 6.08<br>(3.31)              | .03<br>(.973)    | 5.83<br>(3.43) | 4.29<br>(3.49) | 6.22<br>(3.34) | 2.67<br>(4.62) | 1.64<br>(.178) |
| Others being supportive with you | 6.03<br>(3.15) | 5.15<br>(3.02) | 2.61<br>(.009) | 5.83<br>(3.17)              | 5.89<br>(3.22)               | 5.80<br>(3.05)               | 5.69<br>(3.59)                | .03<br>(.992)    | 6.31<br>(3.59) | 6.14<br>(3.04)              | 5.62<br>(3.17)              | 1.74<br>(.176)   | 5.66<br>(3.20) | 6.01<br>(3.06) | 5.42<br>(3.39) | 7.00<br>(1.73) | .83<br>(.479)  |
| Paying the mortgage/rent         | 5.63<br>(3.85) | 4.75<br>(3.65) | 2.12<br>(.034) | 5.32<br>(3.70)              | 6.36<br>(3.75) <sup>a</sup>  | 5.05<br>(3.83) <sup>a</sup>  | 2.94<br>(3.30) <sup>a</sup>   | 6.03<br>(<.001)  | 6.64<br>(4.18) | 6.31<br>(3.76) <sup>a</sup> | 4.83<br>(3.72) <sup>a</sup> | 9.53<br>(<.001)  | 5.28<br>(3.80) | 5.50<br>(3.81) | 5.92<br>(3.91) | 4.00<br>(5.29) | .47<br>(.429)  |
| Paying bills                     | 5.58<br>(3.79) | 4.70<br>(3.58) | 2.17<br>(.031) | 5.20<br>(3.67) <sup>a</sup> | 6.40<br>(3.64) <sup>ab</sup> | 4.96<br>(3.78) <sup>b</sup>  | 3.19<br>(3.25) <sup>b</sup>   | 6.48<br>(<.001)  | 6.36<br>(4.14) | 6.20<br>(3.79) <sup>a</sup> | 4.83<br>(3.63) <sup>a</sup> | 8.25<br>(<.001)  | 5.32<br>(3.76) | 5.43<br>(3.73) | 5.50<br>(3.95) | 4.33<br>(5.13) | .12<br>(.948)  |
| Food                             | 5.13<br>(3.28) | 4.67<br>(3.04) | 1.31<br>(.193) | 4.57<br>(3.18)              | 5.45<br>(3.29)               | 5.04<br>(3.20)               | 4.81<br>(3.12)                | 1.71<br>(.164)   | 6.43<br>(3.03) | 5.49<br>(3.13) <sup>a</sup> | 4.67<br>(3.25) <sup>a</sup> | 5.10<br>(.006)   | 4.66<br>(3.16) | 5.24<br>(3.22) | 5.36<br>(3.60) | 7.33<br>(1.53) | 1.88<br>(.132) |

Note: Highlighted p were significant at .05, .01 or .001. Superscript letters refer to categories between which there are significant differences.



|                         |             |     |      |             |      |      |             |      |      |
|-------------------------|-------------|-----|------|-------------|------|------|-------------|------|------|
| No studies or elemental | 2.82 (2.92) | .19 | .830 | 2.94 (1.14) | 2.43 | .089 | 3.00 (.61)  | 2.99 | .051 |
| Secondary studies       | 3.21 (2.59) |     |      | 2.77 (1.09) |      |      | 2.87 (1.03) |      |      |
| University studies      | 3.16 (2.46) |     |      | 2.59 (1.01) |      |      | 2.68 (.93)  |      |      |

#### **Marital status**

|                                  |             |     |      |             |      |      |             |     |      |
|----------------------------------|-------------|-----|------|-------------|------|------|-------------|-----|------|
| Single                           | 3.22 (2.40) | .62 | .602 | 2.52 (1.02) | 2.52 | .057 | 2.71 (1.02) | .30 | .828 |
| Married or living with a partner | 3.14 (2.59) |     |      | 2.77 (1.07) |      |      | 2.78 (.94)  |     |      |
| Divorced                         | 3.18 (2.70) |     |      | 2.74 (1.02) |      |      | 2.84 (.89)  |     |      |
| Widow/widower                    | 1.50 (3.00) |     |      | 2.75 (.50)  |      |      | 2.75 (.50)  |     |      |

---

Note: Highlighted p were significant at .05, .01 or .001. \* t –test were computed for comparison between gender; ANOVAs were computed for comparisons between more than 2 groups.

**Table S4: Mean comparisons for socio-economic variables: COVID-19 interference (N=493).**

|                                | Gender         |                |                | Age                         |                             |                             |                               |                              | Education      |                |                |                | Marital status              |                                     |                |                    |                |
|--------------------------------|----------------|----------------|----------------|-----------------------------|-----------------------------|-----------------------------|-------------------------------|------------------------------|----------------|----------------|----------------|----------------|-----------------------------|-------------------------------------|----------------|--------------------|----------------|
|                                | Mean (SD)      |                |                | Mean (SD)                   |                             |                             |                               |                              | Mean (SD)      |                |                |                | Mean (SD)                   |                                     |                |                    |                |
| COVID-19<br>interference areas | Female         | Male           | t (p)          | 18 - 24                     | 25 - 40                     | 41 - 65                     | >65                           | F (p)                        | Elementary     | Secondary      | University     | F (p)          | Single                      | Married<br>living with a<br>partner | Divorced       | Widow /<br>widower | F (p)          |
| Life in general                | 8.17<br>(2.11) | 7.78<br>(1.88) | 1.75<br>(.080) | 7.83<br>(2.19) <sup>a</sup> | 8.24<br>(1.83) <sup>b</sup> | 8.33<br>(1.92) <sup>c</sup> | 5.56<br>(2.90) <sup>abc</sup> | 10.42<br>( <b>&lt;.001</b> ) | 6.43<br>(2.98) | 7.96<br>(2.22) | 8.24<br>(1.88) | 5.74<br>(.003) | 8.24<br>(1.88)              | 8.26<br>(2.02)                      | 8.06<br>(2.11) | 8.00<br>(1.00)     | 1.37<br>(.251) |
| Interpersonal<br>relationships | 7.53<br>(2.68) | 7.27<br>(2.35) | .92<br>(.359)  | 7.11<br>(2.74) <sup>a</sup> | 7.40<br>(2.70)              | 7.89<br>(2.28) <sup>a</sup> | 5.88<br>(3.52)                | 4.77<br>(.003)               | 5.71<br>(3.99) | 7.42<br>(2.71) | 7.59<br>(2.43) | 3.57<br>(.029) | 7.59<br>(2.43)              | 7.71<br>(2.57)                      | 7.64<br>(2.39) | 6.00<br>(4.36)     | 2.03<br>(.109) |
| Work                           | 7.19<br>(3.38) | 6.80<br>(3.34) | 1.07<br>(.286) | 6.72<br>(3.44) <sup>a</sup> | 7.57<br>(3.15) <sup>b</sup> | 7.32<br>(3.18) <sup>c</sup> | 3.19<br>(4.37) <sup>abc</sup> | 9.41<br>( <b>&lt;.001</b> )  | 4.29<br>(5.14) | 6.90<br>(3.60) | 7.35<br>(3.05) | 6.17<br>(.002) | 7.35<br>(3.05)              | 7.26<br>(3.39)                      | 7.22<br>(3.16) | 3.00<br>(5.20)     | 1.87<br>(.133) |
| Motivation to work             | 6.48<br>(3.48) | 5.42<br>(3.37) | 2.85<br>(.005) | 6.97<br>(3.04) <sup>a</sup> | 6.73<br>(3.43) <sup>b</sup> | 5.75<br>(3.52) <sup>a</sup> | 2.38<br>(3.61) <sup>ab</sup>  | 11.47<br>( <b>&lt;.001</b> ) | 5.29<br>(4.67) | 6.45<br>(3.51) | 6.18<br>(3.40) | .90<br>(.407)  | 6.18<br>(3.40) <sup>a</sup> | 5.79<br>(3.63) <sup>a</sup>         | 5.92<br>(3.51) | 2.67<br>(4.62)     | 5.49<br>(.001) |

|                        |        |        |                     |        |        |        |        |        |        |        |        |        |        |        |        |        |        |
|------------------------|--------|--------|---------------------|--------|--------|--------|--------|--------|--------|--------|--------|--------|--------|--------|--------|--------|--------|
| Satisfaction with life | 6.43   | 5.57   | 2.62                | 6.27   | 6.45   | 6.18   | 5.06   | 1.06   | 6.21   | 6.42   | 6.14   | .47    | 6.14   | 6.35   | 5.47   | 7.00   | .93    |
|                        | (3.06) | (2.89) | (.009)              | (3.15) | (2.86) | (3.07) | (3.19) | (.367) | (3.47) | (3.16) | (2.94) | (.626) | (2.94) | (2.92) | (3.68) | (1.00) | (.425) |
| Happiness              | 5.98   | 4.83   | 3.56                | 5.73   | 5.99   | 5.67   | 4.13   | 1.88   | 5.36   | 5.90   | 5.64   | .54    | 5.64   | 5.75   | 5.36   | 5.67   | .19    |
|                        | (3.02) | (2.87) | ( <b>&lt;.001</b> ) | (3.04) | (2.92) | (3.09) | (2.53) | (.132) | (3.67) | (3.21) | (2.87) | (.585) | (2.87) | (2.91) | (3.63) | (2.08) | (.901) |

---

Note: Highlighted p were significant at .05, .01 or .001. Superscript letters refer to categories between which there are significant differences.
